# Supplementary material for: Strong coupling effect induced surface reconstruction of CeF3–Ni3N to form CeF3–NiOOH for the oxygen evolution reaction
Source: Royal Society of Chemistry journal article supplement (doi:10.1039/d3se00679d), 2023-01-01
Supplement: d3se00679d1.pdf [file d3se00679d1.pdf]

# Electronic Supplementary Information

Strong Coupling effect induced surface  
reconstruction of  $\text{CeF}_3\text{-Ni}_3\text{N}$  to form  $\text{CeF}_3\text{-NiOOH}$   
for oxygen evolution reaction

*Rajdeep Kaur, †Ashish Gaur, †Jatin Sharma, Vikas Pundir, Aashi and Vivek Bagchi\**

*Institute of Nano Science and Technology, Sector-81, Knowledge City, Sahibzada Ajit Singh  
Nagar, Punjab, Pin - 140306, India*

†both the authors contributed equally

## **Table of Contents**

### **S1.1 Physical Characterization**

### **S1.2 Electrochemical Analysis**

#### **S2.1 PXRD analysis of Ni<sub>3</sub>N and CeF<sub>3</sub>**

#### **S2.2 Wide scan XPS spectra of Ni<sub>3</sub>N and CeF<sub>3</sub>**

#### **S2.3. XPS spectra of NiOOH**

### **S3.1 Reference Table of recently reported catalysts**

#### **S3.2 ECSA normalized LSV curves of CeF<sub>3</sub>-NiOOH, NiOOH and CeF<sub>3</sub>**

#### **S3.3 Cyclic Voltammetry curves of CeF<sub>3</sub>-NiOOH, NiOOH and CeF<sub>3</sub> in non-faradic region**

#### **S3.4 After Stability data of CeF<sub>3</sub>-NiOOH**

### **S1.1 Physical characterization:**

The physical characterization of the as-prepared  $\text{CeF}_3\text{-Ni}_3\text{N}$  was done using various techniques. First of all, by a Bruker Eco D8 ADVANCED X powder X-ray diffractometer consisting of a Ni filter was used for its initial steps of examination. The radiations of  $\text{CuK}\alpha$  ( $\lambda = 1.5405$ , 40 KV and 25 mA) was used for the study. The examination was done in the  $2\theta$  range of  $20^\circ$ -  $80^\circ$  and step size of about 0.0020/step was given. Scanning electron microscope from JEOL (JSM 17-300) was used for studying the morphology of the catalyst. The energy-dispersive X-ray diffractometer (Bruker) study was also done by the same scanning electron microscope. The complete information about the structure of  $\text{CeF}_3\text{-Ni}_3\text{N}$  and the average particle size was measured by Transmission electron microscope (TEM) JEOL-2100 which was operated at 200 KV. X-ray photoelectron spectroscopy (XPS) on ESCA: 220-IXL with  $\text{MgK}\alpha$  is used for further investigation of elements. The  $\text{MgK}\alpha$  used is non-monochromated X-ray beam with photon energy 1253.6 eV.

## S1.2. Electrochemical Analysis:

All the electrochemical measurements were carried out in CHI 760E electrochemical workstation. In the three-electrode system, saturated Ag/AgCl electrode is used as a reference electrode and a Graphitic rod as a counter electrode. Firstly, the prepared electrode was used for taking all the polarization data at a scan rate  $5 \text{ mV s}^{-1}$  in 1 M KOH. After all the polarization data was collected, it was converted to Reversible hydrogen electrode (RHE) by the use of equation  $E_{\text{RHE}} = E_{\text{Ag/AgCl}} + 0.197 + 0.059 \cdot \text{pH}$ . For the calculation of Tafel slope, polarisation curves were again plotted, and the linear region of Tafel plot was fitted to the Tafel equation i.e.,  $\eta = b \log(j) + a$ . The electrochemical surface area (ECSA) was determined by the calculation of double layer capacitance, in which CV scans of the as prepared electrode were taken at a scan rate of 20 to 200 mV/s in 1M KOH in non-faradaic potential range. when  $\Delta J = (J_{\text{anodic}} - J_{\text{cathodic}})/2$  was plotted against the scan rate at a potential of 1.08 V vs RHE and was fitted linearly, it gave the value of double layer capacitance (Cdl). The faradic efficiency was calculated by taking the ratio of experimental and theoretical oxygen evolution in the reaction.

## S2.1. PXRD spectra of as synthesized $\text{CeF}_3$ and $\text{Ni}_3\text{N}$ :

The PXRD pattern was obtained in the  $2\theta$  angular region of  $20^\circ$  to  $80^\circ$  with an increment of  $0.0020/\text{Step}$ .

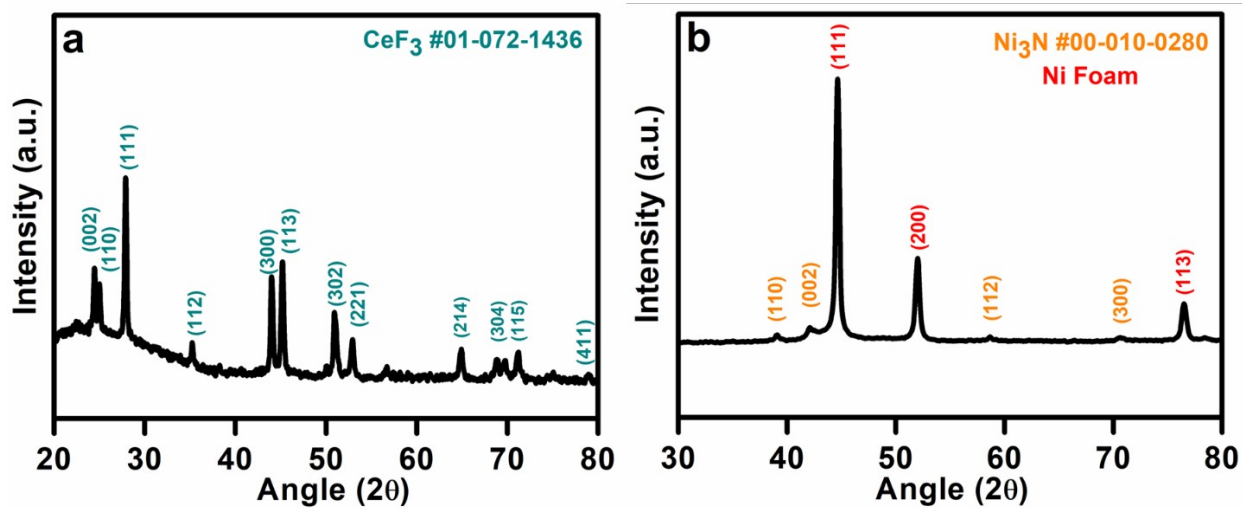

Figure S1. PXRD pattern of  $\text{CeF}_3$  and  $\text{Ni}_3\text{N}$

## S2.2. XPS wide range spectra of Ni<sub>3</sub>N and CeF<sub>3</sub>:

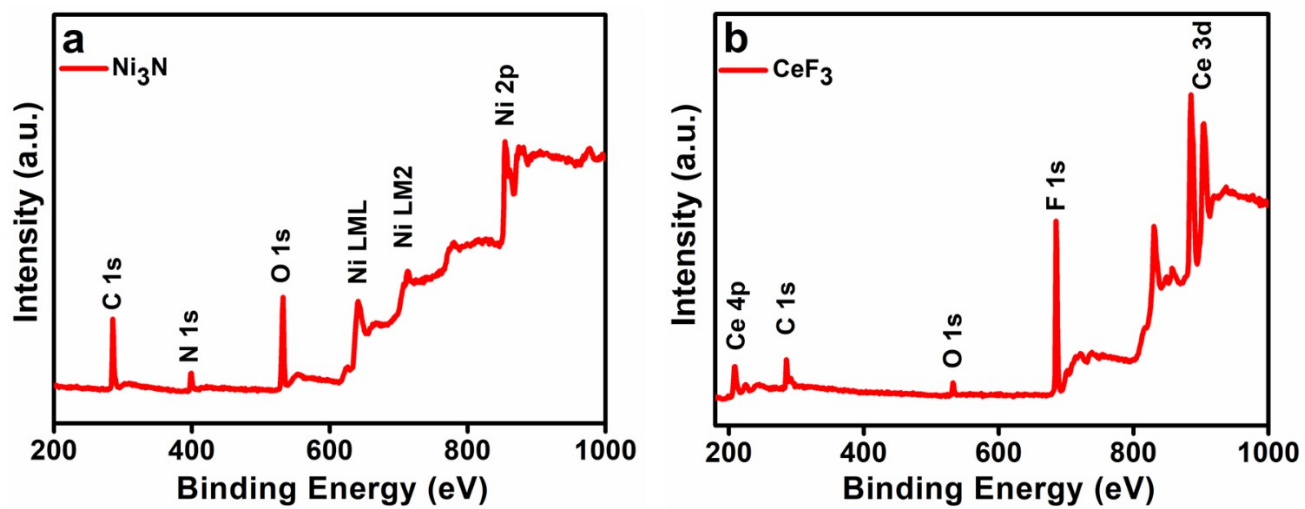

**Figure S2.** XPS wide angle spectrum of Ni<sub>3</sub>N and CeF<sub>3</sub> consisting of Ni, N, Ce and F elements present in the catalyst.

### S2.3. XPS spectra of NiOOH:

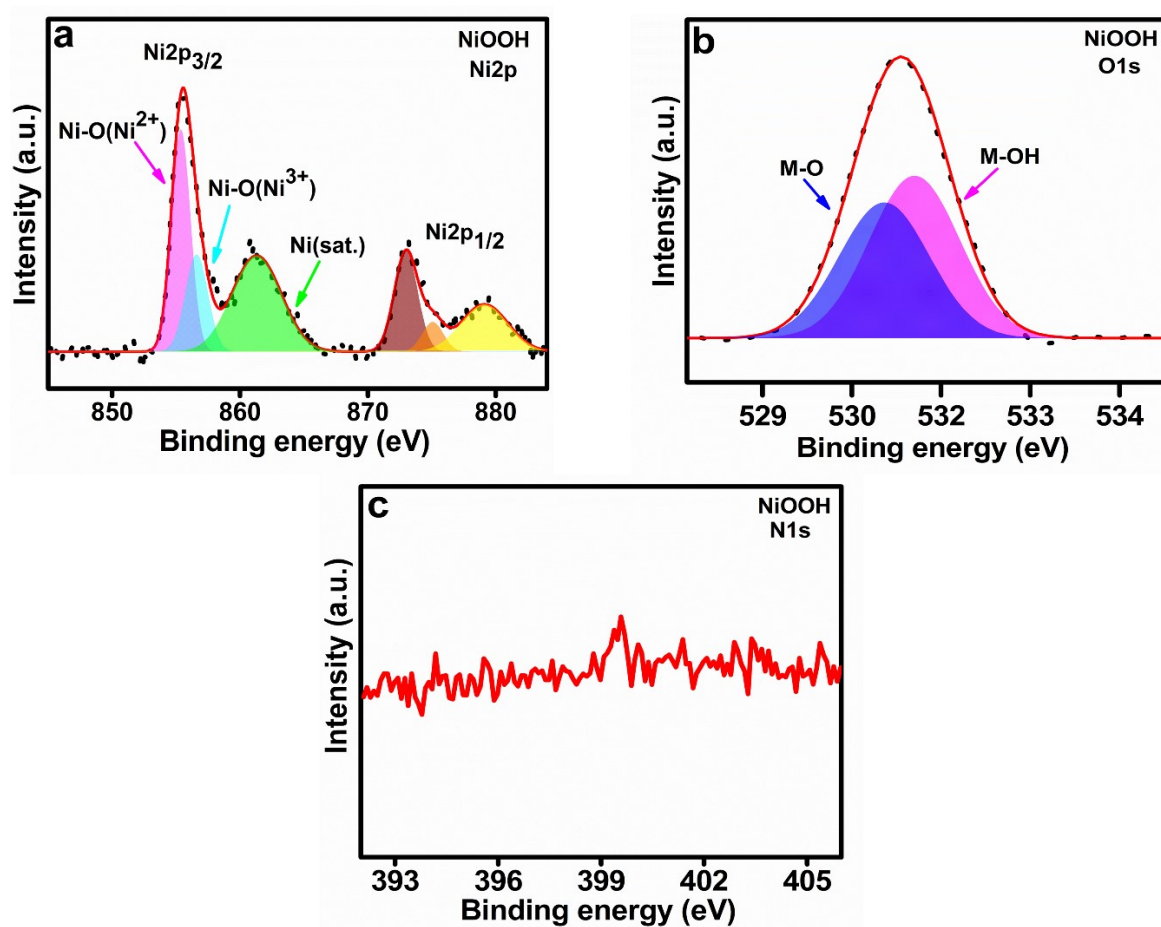

**Figure S3.** XPS High resolution spectra of NiOOH consisting of Ni, N, and O elements present in the catalyst.

### S3.1. Reference table:

| S. No. | Catalyst Name                                    | Electrolyte             | Overpotential (mV) | Tafel Slope (mV/dec) | Reference |
|--------|--------------------------------------------------|-------------------------|--------------------|----------------------|-----------|
| 1.     | Ni <sub>3</sub> N/Ni Foam                        | 1M KOH                  | 262                | -                    | 1         |
| 2.     | Co <sub>3</sub> O <sub>4</sub> -CeO <sub>2</sub> | 1M KOH                  | 270                | 60                   | 2         |
| 3.     | CeO <sub>2</sub> -CoO                            | 1M KOH                  | 296                | 76.78                | 3         |
| 4.     | 2 %Au/Ni <sub>3</sub> N                          | 0.1M KOH                | 280                | 52                   | 4         |
| 5.     | Ni <sub>3</sub> N/NC                             | 1M KOH                  | 310                | -                    | 5         |
| 6.     | Ni <sub>3</sub> N@Ni-Ci NA/CC                    | 1.0 M KHCO <sub>3</sub> | 400                | 143                  | 6         |
| 7.     | Ptnanocluster@Ni <sub>3</sub> N                  | 1M KOH                  | 285                | 57                   | 7         |
| 8.     | BGO/ Ni <sub>3</sub> N                           | 1M KOH                  | 290                | 77.9                 | 8         |
| 9.     | Ni <sub>3</sub> N/NiF                            | 1M KOH                  | 282                | 45                   | 9         |
| 10.    | Co-Ni <sub>3</sub> N                             | 1M KOH                  | 270                | 94                   | 10        |
| 11.    | CeF <sub>3</sub> -NiOOH                          | 1M KOH                  | 259                | 100                  | This work |

**Table S1.** Table containing different catalysts for comparative study with CeF<sub>3</sub>-NiOOH.



S3.2. ECSA normalized LSV curves of CeF<sub>3</sub>-NiOOH, NiOOH and CeF<sub>3</sub>:

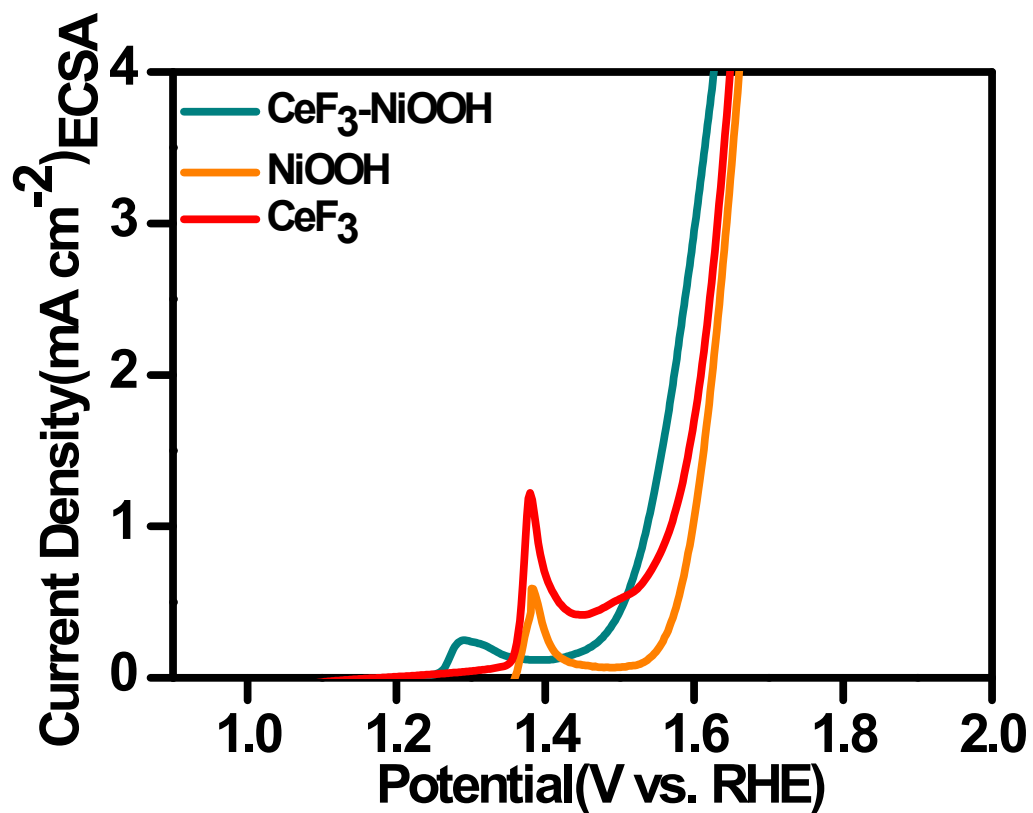

Figure S4. ECSA normalised OER activity of CeF<sub>3</sub>-NiOOH, NiOOH and CeF<sub>3</sub>

**S3.3. Cyclic voltammetry curves of CeF<sub>3</sub>-NiOOH, NiOOH and CeF<sub>3</sub> in non-faradic region:**

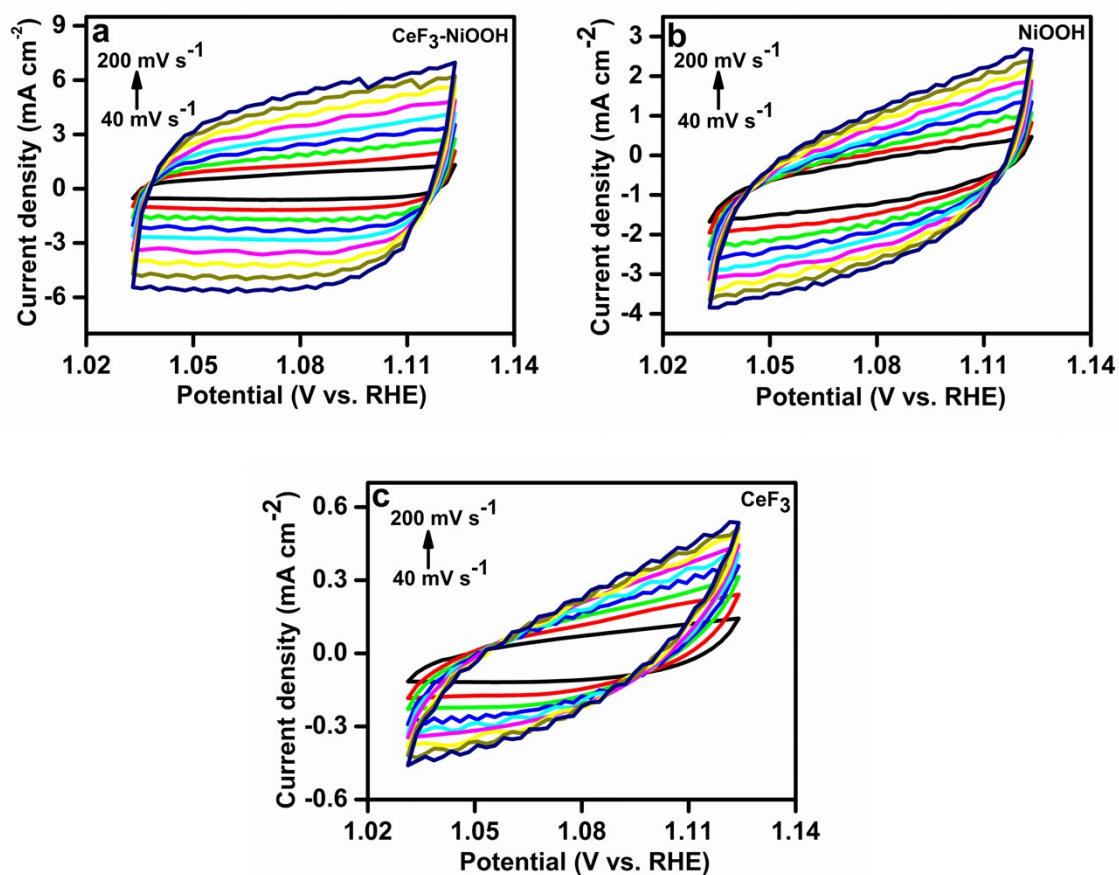

**Figure S5.** Cyclic voltammetry curves of CeF<sub>3</sub>-NiOOH, NiOOH, and CeF<sub>3</sub> at different scan rates for the calculation of double-layer capacitance ( $C_{dl}$ )

### S3.4. After Stability data of CeF<sub>3</sub>-NiOOH:

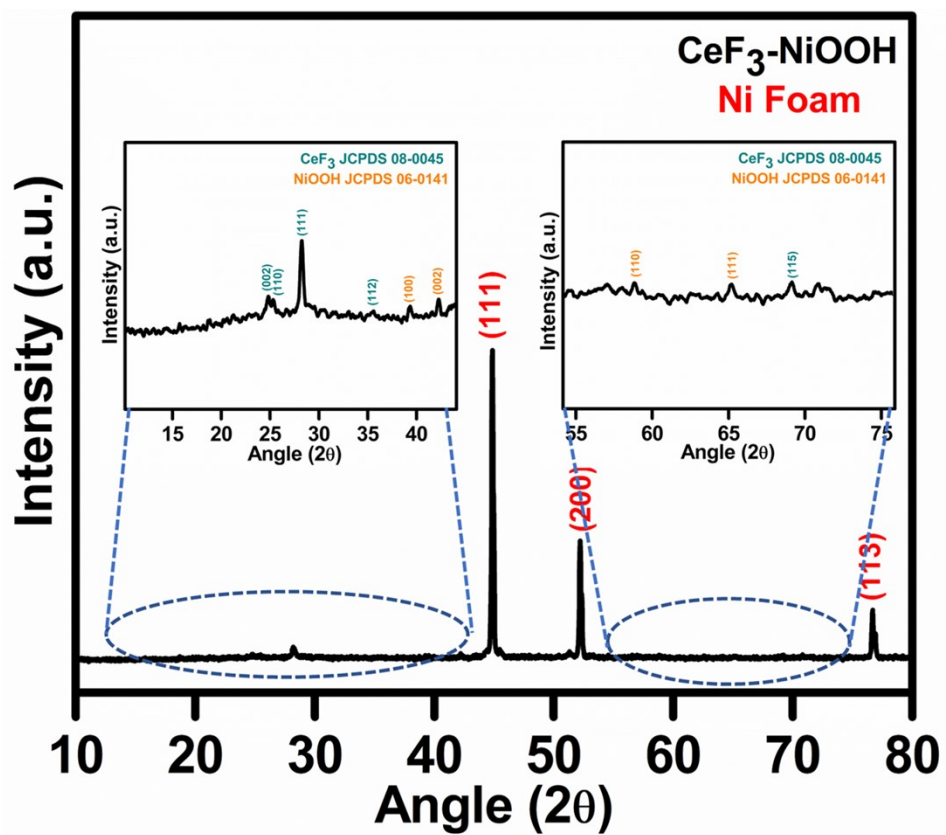

Figure S6. PXRD pattern of the CeF<sub>3</sub>-NiOOH after stability

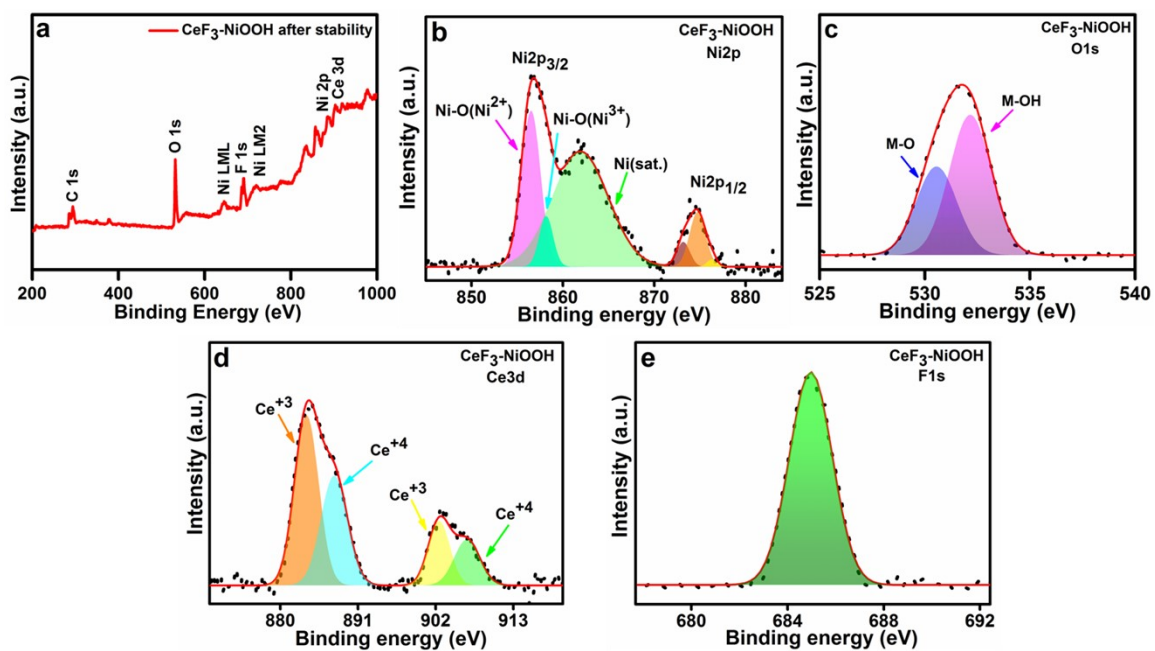

**Figure S7.** (a) XPS wide scan spectra of  $\text{CeF}_3\text{-NiOOH}$  after stability test, high resolution XPS spectra of (b) Ni2p (c) O1s (d) Ce3d and (e) F1s.

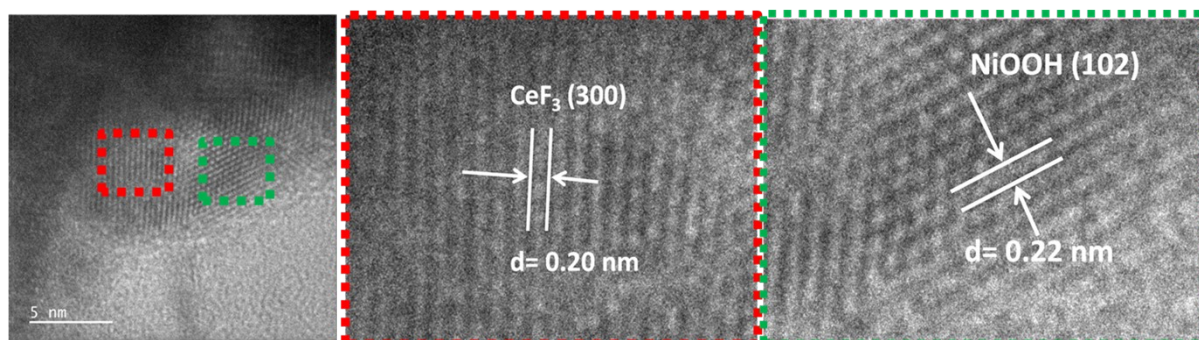

**Figure S8.** HRTEM images of  $\text{CeF}_3\text{-NiOOH}$  after long term stability test

## References: -

1. Kawashima, K., Márquez-Montes, R.A., Li, H., Shin, K., Cao, C.L., Vo, K.M., Son, Y.J., Wygant, B.R., Chunangad, A., Youn, D.H. and Henkelman, G., 2021. Electrochemical behavior of a Ni<sub>3</sub>N OER precatalyst in Fe-purified alkaline media: The impact of self-oxidation and Fe incorporation. *Materials Advances*, 2(7), pp.2299-2309.
2. Liu, Y., Ma, C., Zhang, Q., Wang, W., Pan, P., Gu, L., Xu, D., Bao, J. and Dai, Z., 2019. 2D electron gas and oxygen vacancy induced high oxygen evolution performances for advanced Co<sub>3</sub>O<sub>4</sub>/CeO<sub>2</sub> nanohybrids. *Advanced Materials*, 31(21), p.1900062.
3. Li, W., Zhao, L., Wang, C., Lu, X. and Chen, W., 2021. Interface Engineering of Heterogeneous CeO<sub>2</sub>-CoO Nanofibers with Rich Oxygen Vacancies for Enhanced Electrocatalytic Oxygen Evolution Performance. *ACS Applied Materials & Interfaces*, 13(39), pp.46998-47009.
4. Lv, M., Zhou, Y., Rasaki, S.A., Shen, H., Wang, C., Song, W., Thomas, T., Yang, M. and Wang, J., 2019. Gold Nanocluster-Decorated Nickel Nitride as Stable Electrocatalyst for Oxygen Evolution Reaction in Alkaline Media. *ChemElectroChem*, 6(22), pp.5744-5749.
5. Chen, M., Qi, J., Guo, D., Lei, H., Zhang, W. and Cao, R., 2017. Facile synthesis of sponge-like Ni<sub>3</sub>N/NC for electrocatalytic water oxidation. *Chemical Communications*, 53(69), pp.9566-9569.
6. Xie, F., Wu, H., Mou, J., Lin, D., Xu, C., Wu, C. and Sun, X., 2017. Ni<sub>3</sub>N@Ni-Ci nanoarray as a highly active and durable non-noble-metal electrocatalyst for water oxidation at near-neutral pH. *Journal of Catalysis*, 356, pp.165-172.
7. Pei, Y., Rezaei, B., Zhang, X., Li, Z., Shen, H., Yang, M. and Wang, J., 2020. Interface catalysis by Pt nanocluster@Ni<sub>3</sub>N for bifunctional hydrogen evolution and oxygen evolution. *Materials Chemistry Frontiers*, 4(9), pp.2665-2672.
8. Li, B., Song, F., Qian, Y., Shaw, J. and Rao, Y., 2020. Boron-doped graphene oxide-supported nickel nitride nanoparticles for electrocatalytic oxygen evolution in alkaline electrolytes. *ACS Applied Nano Materials*, 3(10), pp.9924-9930.
10. Tareen, A.K., Priyanga, G.S., Khan, K., Pervaiz, E., Thomas, T. and Yang, M., 2019. Nickel-based transition metal nitride electrocatalysts for the oxygen evolution reaction. *ChemSusChem*, 12(17), pp.3941-3954.
